# Supplementary material
Source: PubMed Central journal article supplement (PMC3541950)
Supplement: NIHMS183822-supplement-Movie_Legends.pdf [file NIHMS183822-supplement-Movie_Legends.pdf]

## Movie Legends

### Supplementary Video 1

Variable twist in ParM filaments. An animated GIF showing the averaged power spectra computed from the segments in five different bins of the histogram in Fig. 2a. This shows clearly that the sorting is effective, as the power spectra behave exactly as one would expect from segments having different twists. The layer lines shift positions (with respect to the distance from the equator) as the twist varies in these segments.  
(open "animated gif" in browser to view).

### Supplementary Video 2

Domains rotate as twist changes. An animated GIF showing a comparison between two twist states of ParM filaments ( $165.2^\circ$  and  $169.6^\circ$ ) reconstructed from frozen-hydrated specimens ( $n \approx 6,000$  segments for each). The change in twist ( $\approx 4^\circ$ ) can be seen to be coupled with a larger change ( $\approx 10^\circ$ ) in the domain-domain orientation of the two major domains within the ParM subunit.  
(open "animated gif" in browser to view).
